# Supplementary material for: Differential Contributions of mSWI/SNF Chromatin Remodeler Sub-Families to Myoblast Differentiation
Source: MDPI journal article supplement (doi:10.3390/ijms241411256), 2023-07-09
Supplement: s1 [file s1]

## **Differential contributions of mSWI/SNF chromatin remodeler sub-families to myoblast differentiation**

Teresita Padilla-Benavides<sup>1\*#</sup>, Monserrat Olea-Flores<sup>1,2#</sup>, Tapan Sharma<sup>2</sup>, Sabriya A. Syed<sup>2&</sup>, Hanna Witwicka<sup>2%</sup>, Miriam D. Zuñiga-Eulogio<sup>1,3</sup>, Kexin Zhang<sup>1</sup>, Napoleon Navarro-Tito<sup>3</sup> and Anthony N. Imbalzano<sup>2\*</sup>

<sup>1</sup>Department of Molecular Biology and Biochemistry, Wesleyan University, Middletown, CT, 06459, USA

<sup>2</sup>Department of Biochemistry and Molecular Biotechnology, University of Massachusetts Chan Medical School, Worcester, MA, 01605, USA

<sup>3</sup>Facultad de Ciencias Químico Biológicas, Universidad Autónoma de Guerrero, Guerrero, Mexico

\*Correspondence: T.P.-B. [tpadillabena@wesleyan.edu](mailto:tpadillabena@wesleyan.edu) and A.N.I. [Anthony.Imbalzano@umassmed.edu](mailto:Anthony.Imbalzano@umassmed.edu)

# The authors contributed equally to this manuscript

& Present address: The Jackson Laboratory for Genomic Medicine, Farmington, CT 06032, USA

% Present address: Charles River Laboratories, Shrewsbury MA, 01545, USA

### **Emails and ORCID:**

T.P.-B. [tpadillabena@wesleyan.edu](mailto:tpadillabena@wesleyan.edu) 0000-0002-4624-0822

M.O.-F. [Monserrat.OleaFlores@umassmed.edu](mailto:Monserrat.OleaFlores@umassmed.edu) 0000-0003-1813-9062

S.A.S. [sabriya.syed@jax.org](mailto:sabriya.syed@jax.org) 0000-0003-3776-3581

T.S. [tapan.sharma@umassmed.edu](mailto:tapan.sharma@umassmed.edu) 0000-0003-2495-2236

M.D.Z.-E. [miriamzuniga@uagro.mx](mailto:miriamzuniga@uagro.mx) 0000-0003-2904-8350

N.N.-T. [nnavarro@uagro.mx](mailto:nnavarro@uagro.mx) 0000-0003-4911-0545

H.W. [hanna.witwicka@crl.com](mailto:hanna.witwicka@crl.com)

K.Z. [kzhang@wesleyan.edu](mailto:kzhang@wesleyan.edu) 0000-0003-4504-0017

A.N.I. [Anthony.Imbalzano@umassmed.edu](mailto:Anthony.Imbalzano@umassmed.edu) 0000-0003-0744-3413

**Figure S1**

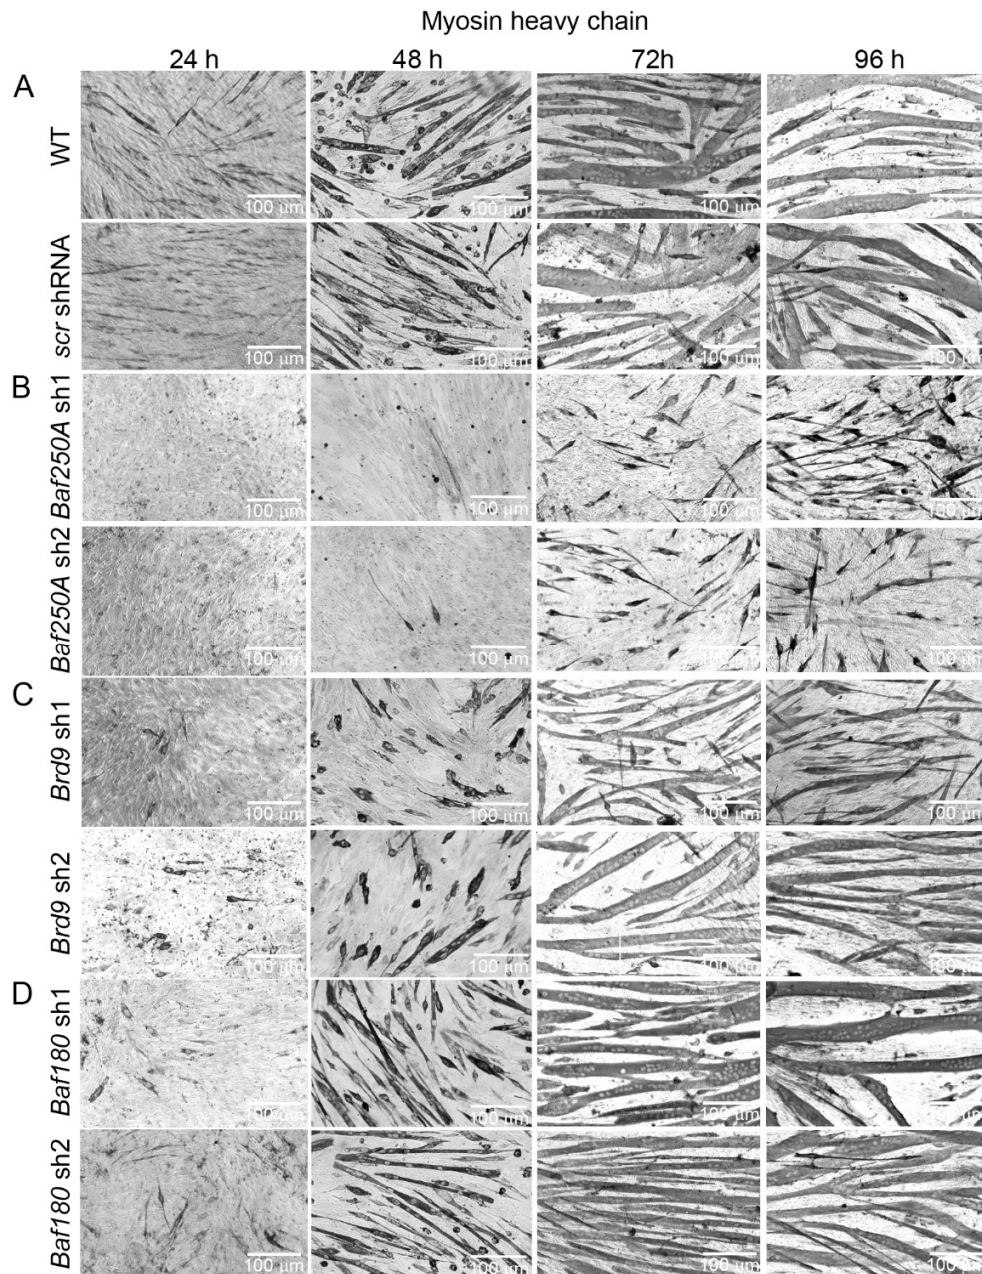

**Figure S1. *Baf250A* knockdown inhibited the differentiation of C2C12 cells.**

Representative light micrographs of differentiating (A) wild type (WT) C2C12 myoblasts and cells transduced with *scr* shRNA (B) transduced with *Baf250A* shRNAs, (C) transduced with *Brd9* shRNAs, or (D) transduced with *Baf180* shRNAs. Cells at 24, 48, 72 and 96 h of differentiation were immunostained for myosin heavy chain. Bars = 100 µm.

**Figure S2**

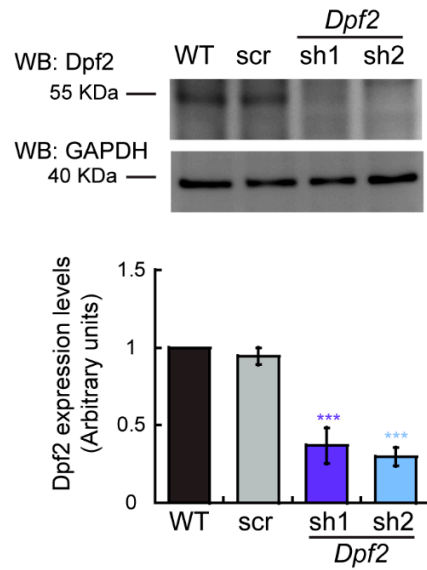

**Figure S2. Expression levels of Dpf2 in differentiating wildtype (WT) C2C12 myoblasts.** Representative immunoblots (top) and quantification of Dpf2 levels in myoblasts differentiating for 48 h. Immunoblots against GAPDH were used as loading controls. Samples were compared to the wild type sample, the value of which was set at 1.0. Data are the mean  $\pm$  SE for three independent experiments. \*\*\*P < 0.001.

**Figure S3**

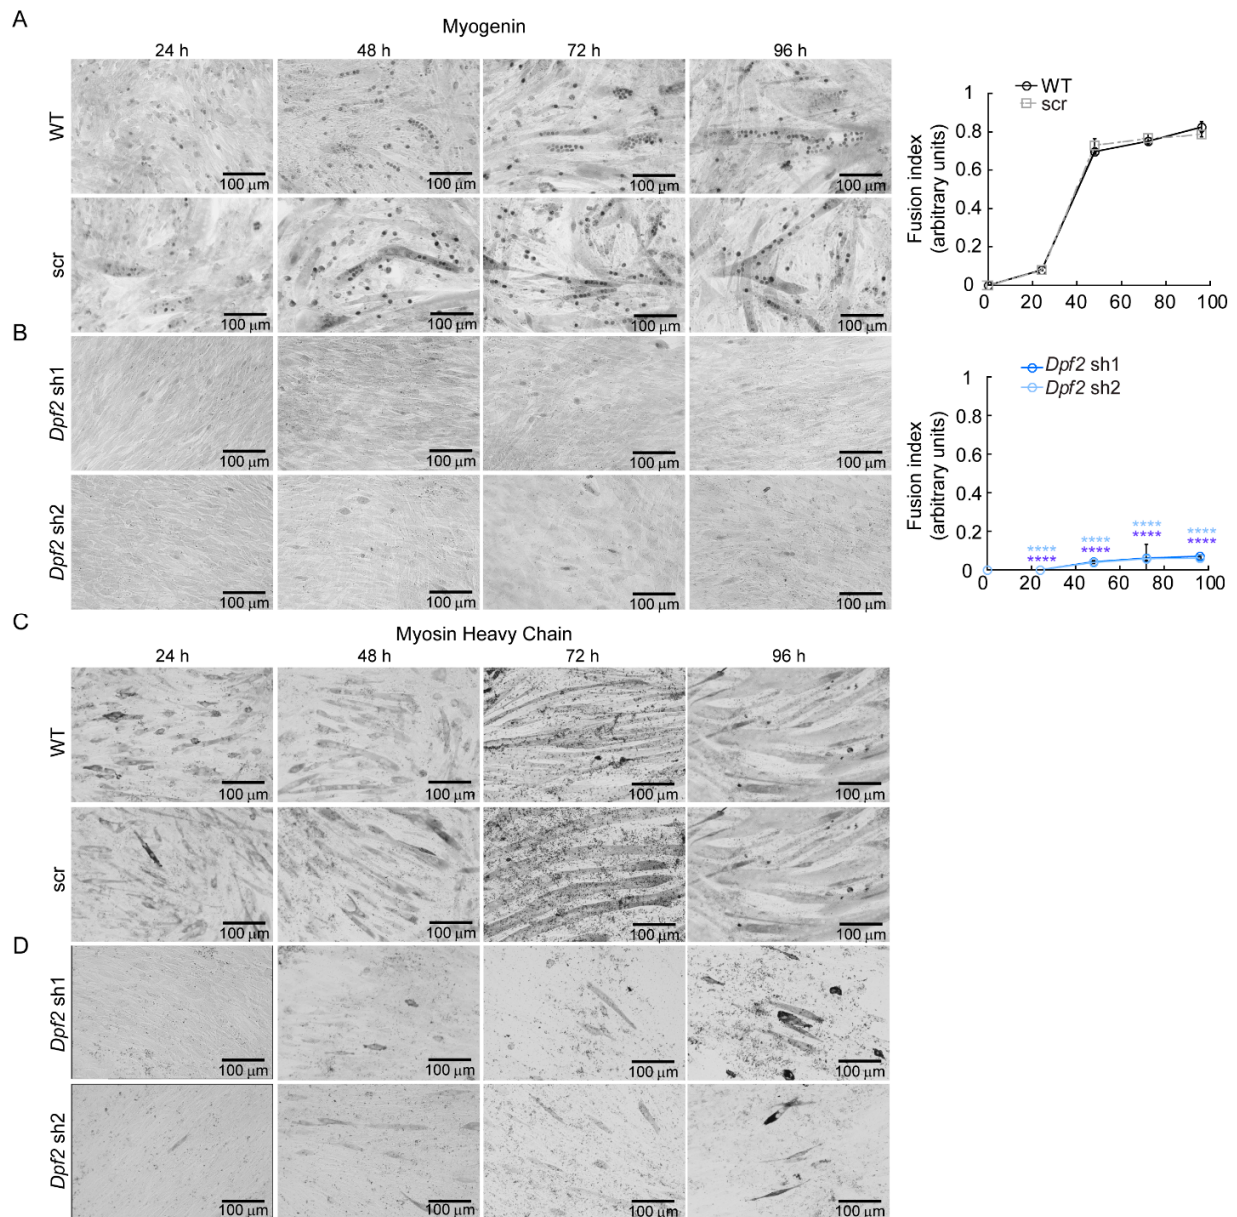

**Figure S3. *Dpf2* knockdown inhibited the differentiation of C2C12 cells.** Representative light micrographs and fusion index of differentiating **(A)** wild type (WT) C2C12 myoblasts and cells transduced with *scr* shRNA **(B)** transduced with *Dpf2* shRNAs. Cells at 24, 48, 72 and 96 h of differentiation were immunostained for myogenin and myosin heavy chain. Bars = 100  $\mu$ m. \*\*\*\*  $P < 0.0001$ .

**Table S1. Pearson coefficients for the two replicate samples for each KD RNA-Seq dataset**

| Sample                               | Pearson coefficient |
|--------------------------------------|---------------------|
| <i>scr</i> shRNA differentiation     | 0.96                |
| <i>Baf250A</i> shRNA differentiation | 0.98                |
| <i>Brd9</i> shRNA differentiation    | 0.965               |
| <i>Baf180</i> shRNA differentiation  | 0.975               |

**Table S3. Sequences of the shRNAs used in this study**

| <b>Gene name</b>                                                               | <b>Sequence</b>                                                | <b>Catalog number<br/>(Sigma)</b> |
|--------------------------------------------------------------------------------|----------------------------------------------------------------|-----------------------------------|
| <i>Baf250</i> sh1                                                              | CCGGCTTTATAGTATGGCGAGTTAACTCGAGTTAACTCGCCA<br>TACTATAAAGTTTTTG | TRCN0000238304                    |
| <i>Baf250</i> sh2                                                              | CCGGCCTAGGCAGCCTAACTATAATCTCGAGATTATAGTTAG<br>GCTGCCTAGGTTTTTG | TRCN0000238306                    |
| <i>Brd9</i> sh1                                                                | CCGGTGGACTTTGGCAGCATGAAAGCTCGAGCTTTCATCGT<br>GCCAAAGTCCATTTTTG | TRCN0000225737                    |
| <i>Brd9</i> sh2                                                                | CCGGCACCGAATGGTGTCCAATAAGCTCGAGCTTATTGGAC<br>ACCATTCGGTGTTTTTG | TRCN0000225739                    |
| <i>Baf180</i> sh1                                                              | CCGGTGTGAAGTTGGTCCTAGTTTACTCGAGTAACTAGGAC<br>CAACTTCACATTTTTG  | TRCN0000304680                    |
| <i>Baf180</i> sh2                                                              | CCGGGTGCAATATCCAGACTATTATCTCGAGATAATAGTCTG<br>GATATTGCACTTTTTG | TRCN0000304681                    |
| <i>Dpf2</i> sh1                                                                | CCTGGTGATTACAGGGTCAAA                                          | TRCN0000084343                    |
| <i>Dpf2</i> sh2                                                                | GCCTAACAACTACTGTGACTT                                          | TRCN0000084345                    |
| <i>scr</i> shRNA<br>pLKO.1-puro non-<br>target shRNA<br>control plasmid<br>DNA | CCGGCAACAAGATGAAGAGCACCAACTCGAGTTGGTGCTCT<br>TCATCTTGTTGTTTTT  | MFCD07785395<br>SHC002            |

**Table S4. List of primers used in this study**

| <b>Primer name</b>       | <b>5' sequence</b>              | <b>3' sequence</b>             | <b>Use</b>      | <b>Reference</b>                                      |
|--------------------------|---------------------------------|--------------------------------|-----------------|-------------------------------------------------------|
| <i>q-Myogenin</i>        | CAAGTGTGCACATCTGT<br>TCTAGTCTCT | GTATCATCAGCACAGGAGA<br>CCTTGGT | Gene expression | Hernandez-Hernandez <i>et al.</i> , 2013 <sup>1</sup> |
| <i>q-Ckm</i>             | CTGTCCGTGGAAGCTCT<br>CAACAGC    | TTTTGTTGTCGTTGTGCCAG<br>ATGCC  | Gene expression | Hernandez-Hernandez <i>et al.</i> , 2013 <sup>1</sup> |
| <i>q-MyHCIIb</i>         | TCAATGAGATGGAGATC<br>CAGCTGAAC  | GTCCAGGTGCAGCTGTGTG<br>TCCTTC  | Gene expression | Hernandez-Hernandez <i>et al.</i> , 2013 <sup>1</sup> |
| <i>q-Cav3</i>            | TCAATGAGGACATTGTG<br>AAGGTAGA   | CAGTGTAGACAACAGGCGG<br>T       | Gene expression | Witwicka <i>et al.</i> , 2019 <sup>2</sup>            |
| <i>q-Eef1A1</i>          | GGCTTCACTGCTCAGGT<br>GATTATC    | ACACATGGGCTTGCCAGGG<br>AC      | Gene expression | Hernandez-Hernandez <i>et al.</i> , 2013 <sup>1</sup> |
| <i>Myogenin promoter</i> | ACGCCAACTGCTGGGTG<br>CCA        | GAATCACATGTAATCCACTG<br>GA     | ChIP qPCR       | Hernandez-Hernandez <i>et al.</i> , 2013 <sup>1</sup> |
| <i>Ckm enhancer</i>      | GACACCCGAGATGCCTG<br>GTT        | GATCCACCAGGGACAGGGT<br>T       | ChIP qPCR       | Hernandez-Hernandez <i>et al.</i> , 2013 <sup>1</sup> |
| <i>MyHCIIb promoter</i>  | CACCCAAGCCGGGAGAA<br>ACAGCC     | GAGGAAGGACAGGACAGAG<br>GCACC   | ChIP qPCR       | Hernandez-Hernandez <i>et al.</i> , 2013 <sup>1</sup> |
| <i>Cav3 promoter</i>     | CCTAGGTGTCTCAGTCC<br>AGTTA      | CTGCCACGTAGATCTTGGA<br>AAT     | ChIP qPCR       | Witwicka <i>et al.</i> , 2019 <sup>2</sup>            |
| <i>IgH enhancer</i>      | GCCGATCAGAACCAGAA<br>CACC       | TGGTGGGGCTGGACAGAGT<br>GTTTC   | ChIP qPCR       | Hernandez-Hernandez <i>et al.</i> , 2013 <sup>1</sup> |

### Supplemental references

- 1 Hernandez-Hernandez, J. M., Mallappa, C., Nasipak, B. T., Oesterreich, S. & Imbalzano, A. N. The Scaffold attachment factor b1 (Safb1) regulates myogenic differentiation by facilitating the transition of myogenic gene chromatin from a repressed to an activated state. *Nucleic Acids Res* **41**, 5704-5716, doi:10.1093/nar/gkt285 (2013).
- 2 Witwicka, H. *et al.* Calcineurin broadly regulates the initiation of skeletal muscle-specific gene expression by binding target promoters and facilitating the interaction of the SWI/SNF chromatin remodeling enzyme. *Mol Cell Biol*, doi:10.1128/MCB.00063-19 (2019).
